# Supplementary material
Source: PubMed Central journal article supplement (PMC4409767)
Supplement: NIHMS664450-supplement-6.pdf [file NIHMS664450-supplement-6.pdf]

# Supplementary Figure 1

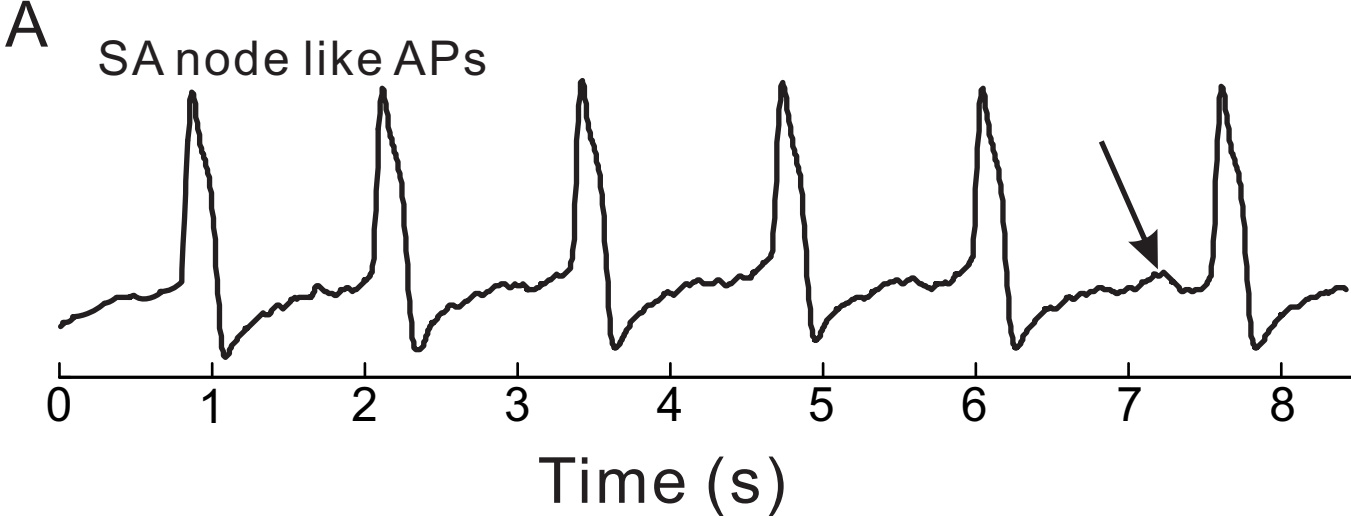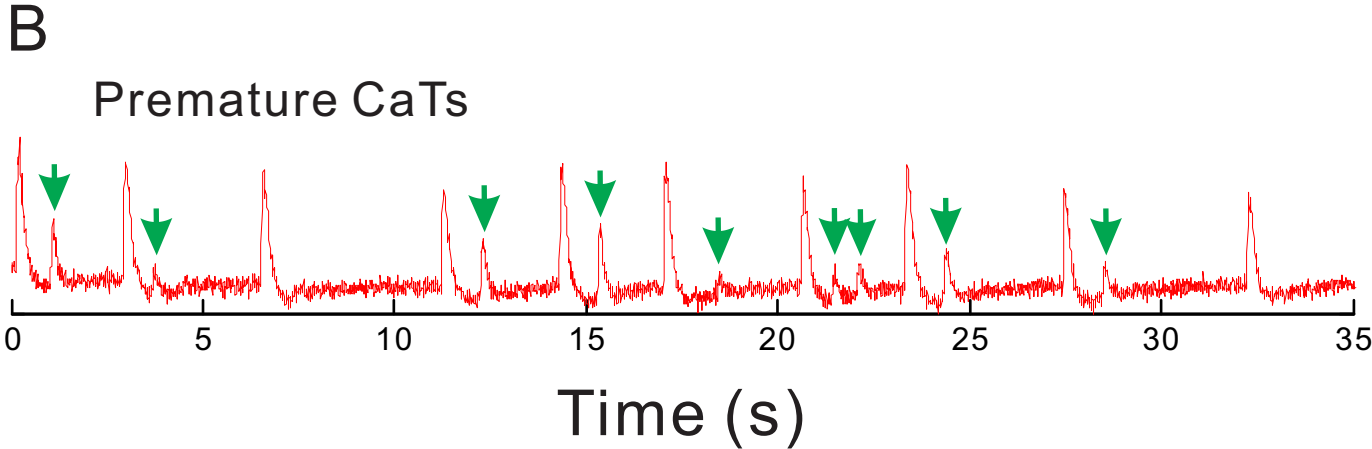

# Supplementary Figure 2

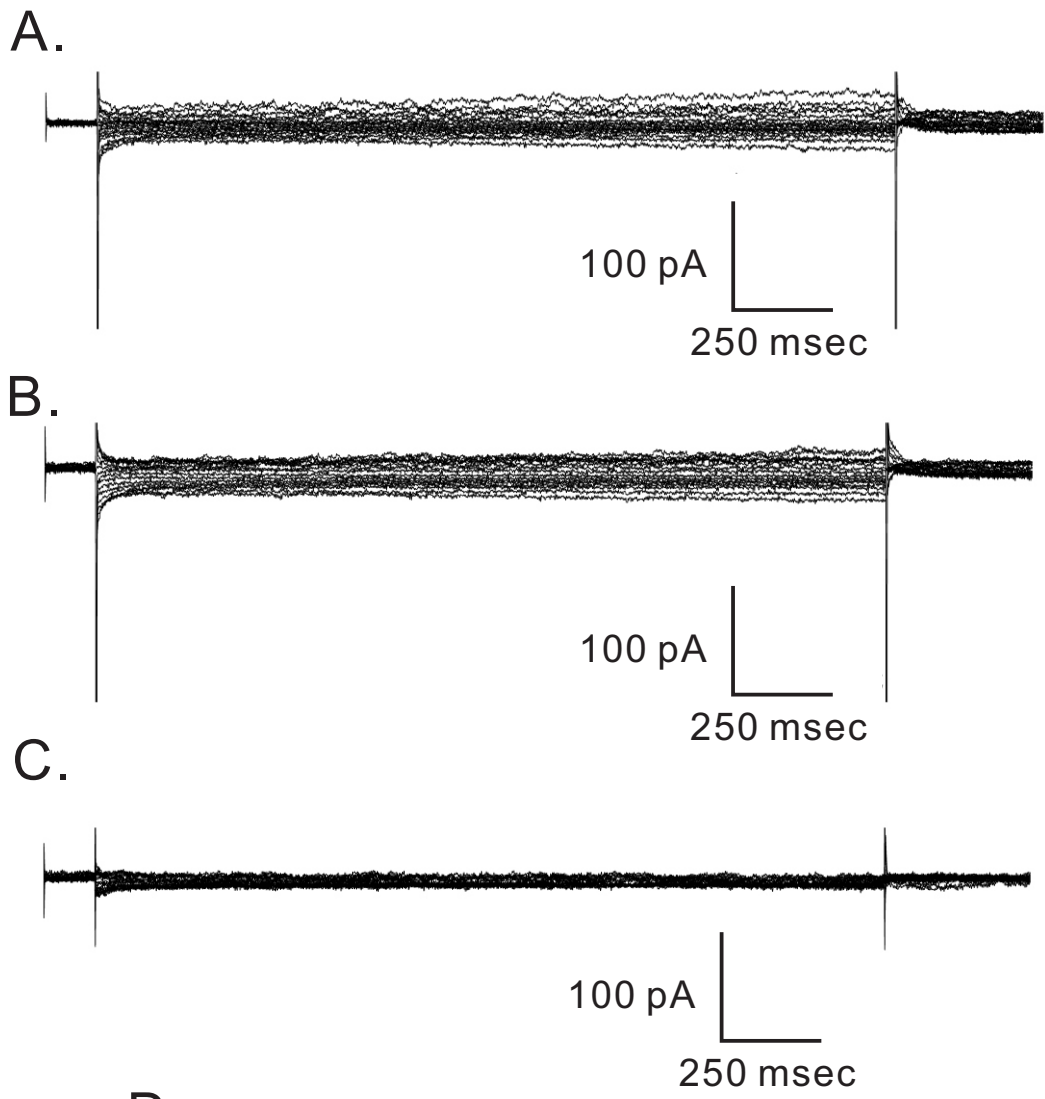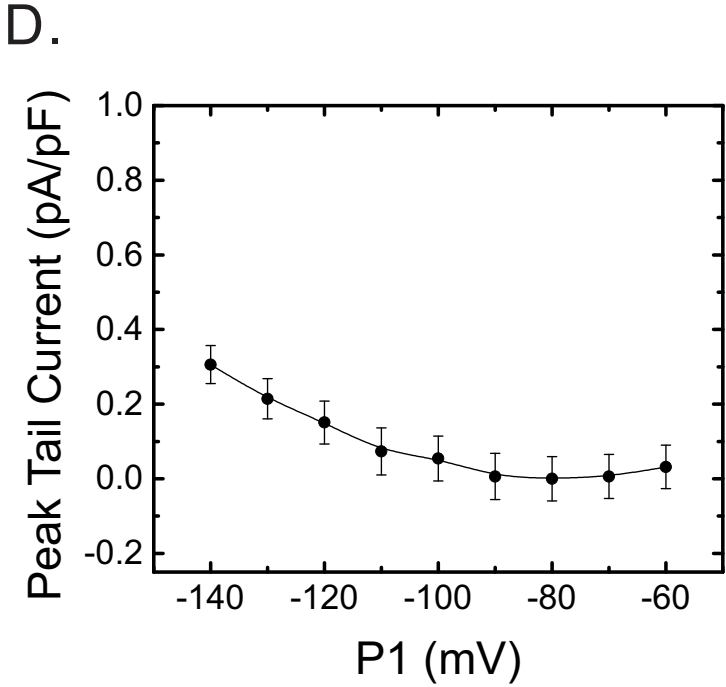

**Table 1. Summary of Statistical Analysis**

|  |                                                   |                                         |             |
|--|---------------------------------------------------|-----------------------------------------|-------------|
|  | Control                                           | 3 $\mu$ M Ivabradine                    | N=8, P=0.73 |
|  | 0.97 $\pm$ 0.31                                   | 0.96 $\pm$ 0.30                         |             |
|  | Control (4mM [K <sup>+</sup> ] <sub>o</sub> )     | 8 mM [K <sup>+</sup> ] <sub>o</sub>     | N=6, P<0.01 |
|  | 1.06 $\pm$ 0.24                                   | 0.21 $\pm$ 0.11                         |             |
|  | Control (1.8mM [Ca <sup>2+</sup> ] <sub>o</sub> ) | 0.1 mM [Ca <sup>2+</sup> ] <sub>o</sub> | N=5, P<0.01 |
|  | 1.42 $\pm$ 0.15                                   | 0.3 $\pm$ 0.06                          |             |
|  | Control                                           | 100 $\mu$ M Caffeine                    | N=4, P<0.01 |
|  | 0.91 $\pm$ 0.15                                   | 2.21 $\pm$ 0.18                         |             |
|  | Control                                           | 2 $\mu$ M K201                          | N=4, P<0.01 |
|  | 0.85 $\pm$ 0.05                                   | 0.49 $\pm$ 0.06                         |             |
|  | Control                                           | 5 $\mu$ M Tetracaine                    | N=6, P<0.01 |
|  | 0.95 $\pm$ 0.17                                   | 0.24 $\pm$ 0.16                         |             |
|  | Control                                           | 1mM Ascorbic acid                       | N=6, P<0.01 |
|  | 1.28 $\pm$ 0.15                                   | 0.76 $\pm$ 0.13                         |             |
|  | Control                                           | 10 mM N-Acetyl-L cysteine               | N=7, P<0.01 |
|  | 1.37 $\pm$ 0.17                                   | 0.74 $\pm$ 0.07                         |             |
|  | Control                                           | 2 $\mu$ M SEA400                        | N=5, P<0.01 |
|  | 0.95 $\pm$ 0.17                                   | 0.12 $\pm$ 0.09                         |             |

\* Frequencies (mean  $\pm$  standard deviation), Two-tail paired T-Test, N = total number of cell cultures that were tested
